# Supplementary material for: Extracellular vesicles derived from ascitic fluid enhance growth and migration of ovarian cancer cells
Source: PubMed Central journal article supplement (PMC8080718; doi:10.1038/s41598-021-88163-1), 2021-04-28
Supplement: 41598_2021_88163_MOESM1_ESM.pdf [file 41598_2021_88163_MOESM1_ESM.pdf]

Extracellular Vesicles Derived from Ascitic Fluid Enhance Growth and Migration of Ovarian Cancer Cells

Aparna Mitra<sup>1</sup>, Kyoko Court<sup>1</sup>, Travis Solley<sup>1</sup>, Megan Mikkelsen<sup>1</sup>, Chi Lam Au Yeung<sup>2</sup>, Alpa Nick<sup>3</sup>, Karen Lu<sup>1</sup> and Ann H. Klopp<sup>1\*</sup>

<sup>1</sup> Department of Radiation Oncology, The University of Texas MD Anderson Cancer Center, 1515 Holcombe Boulevard, Houston, TX 77030, USA.

Electronic address: [aklopp@mdanderson.org](mailto:aklopp@mdanderson.org).

<sup>2</sup> Department of Gynecologic Oncology and Reproductive Medicine, The University of Texas MD Anderson Cancer Center, Houston, TX 77030, USA.

<sup>3</sup> Tennessee Oncology, Nashville, Tennessee 37203, USA.

Supplemental I:

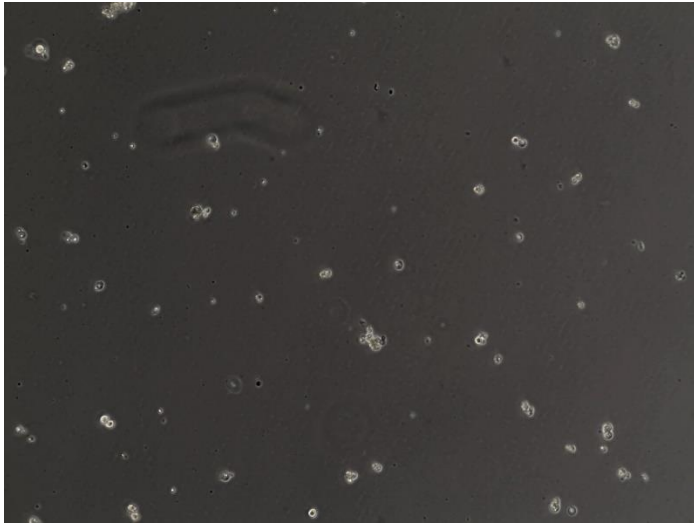

**Malignant Ascites S35**

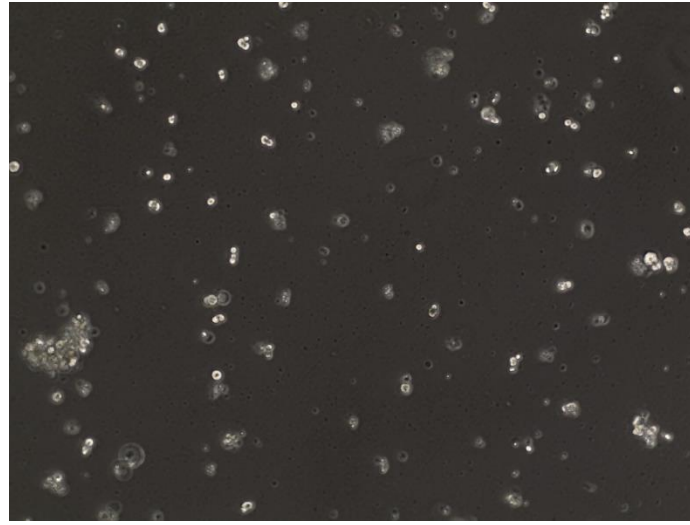

**Malignant Ascites S35 + Benign exosome (S10)**

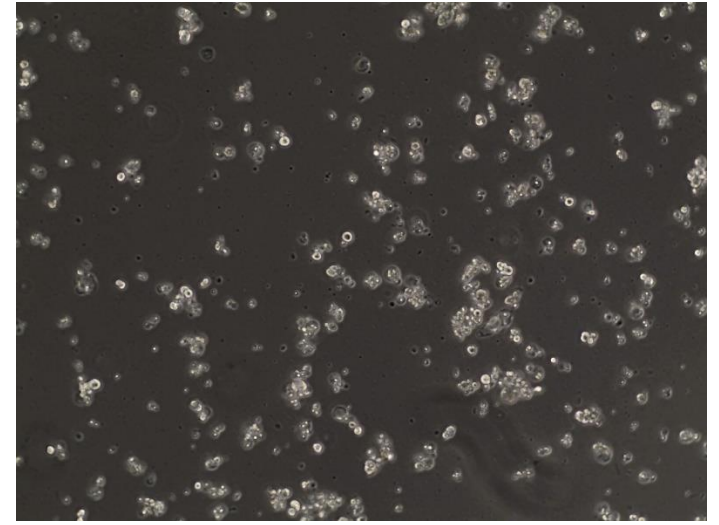

**Malignant Ascites S35 + Malignant exosome (S16)**

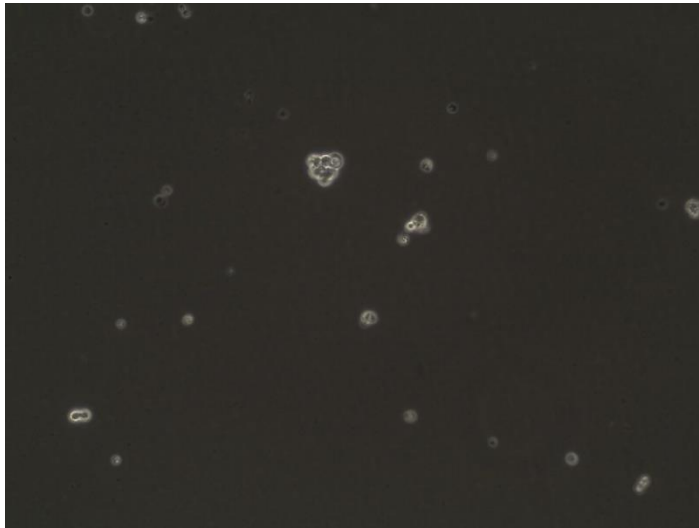

**Malignant Ascites S16**

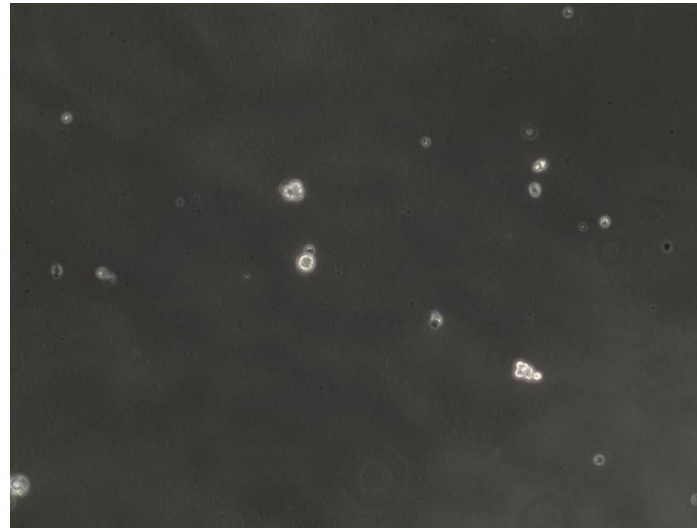

**Malignant Ascites S16 + Malignant exosome (S35)**

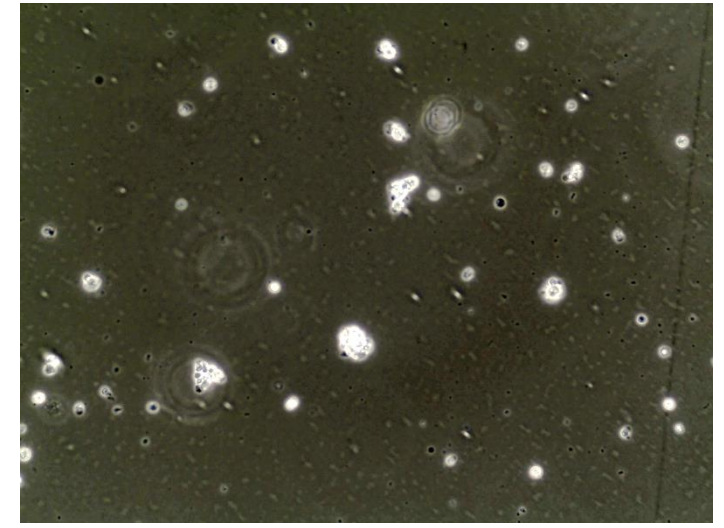

**Malignant Ascites S16 + Malignant exosome (S35)**

Supplemental II:

No peaks detected at 28S and 18S positions of the exosomal miRNAs

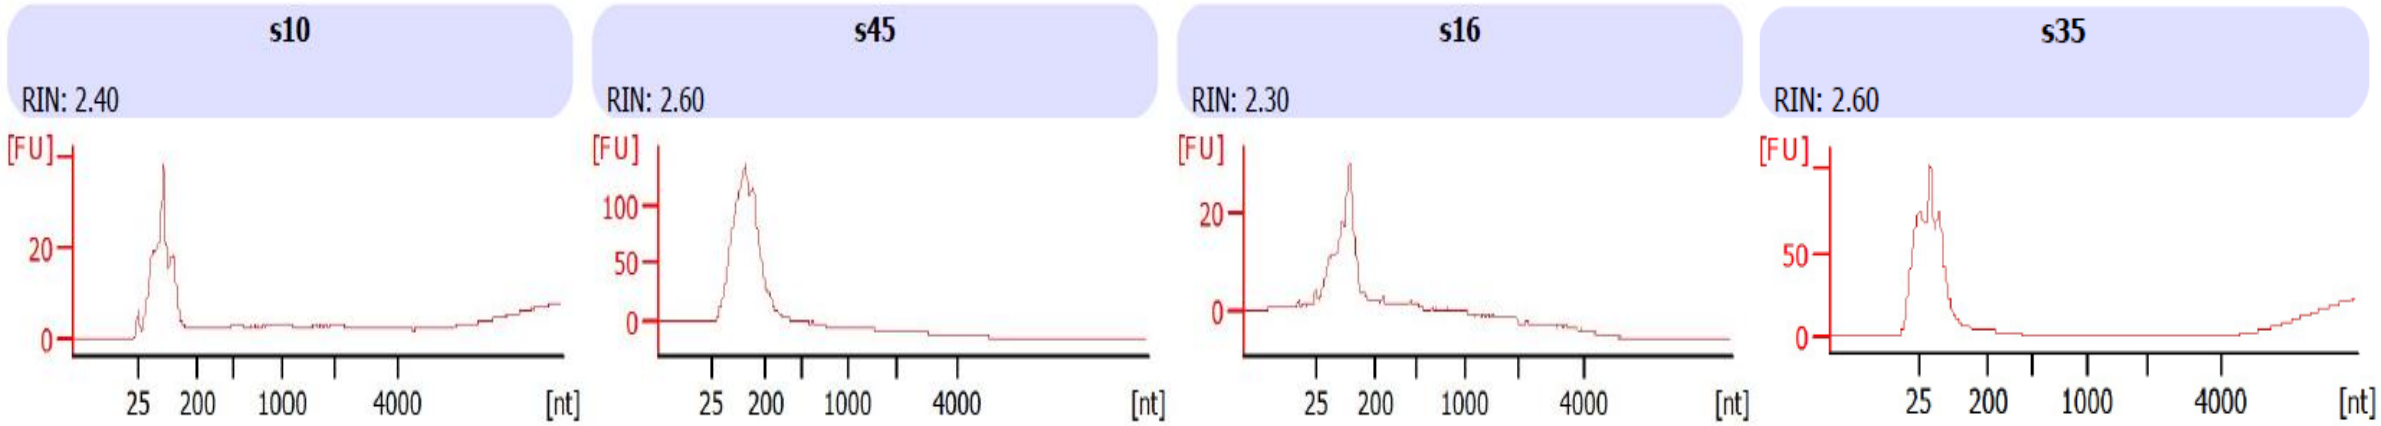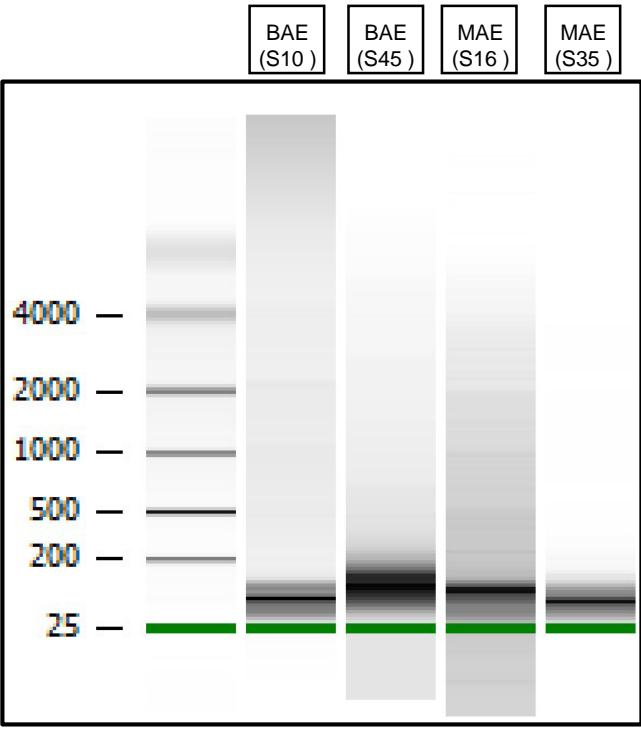

Supplemental III:

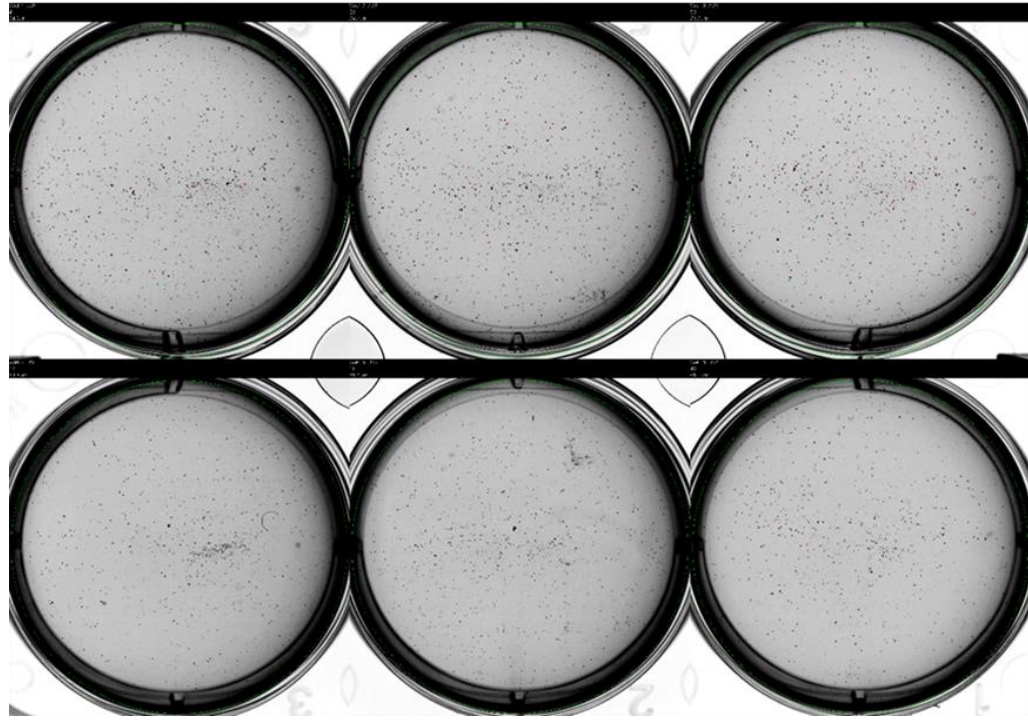

Cntrl mimic

Mir 100mimic

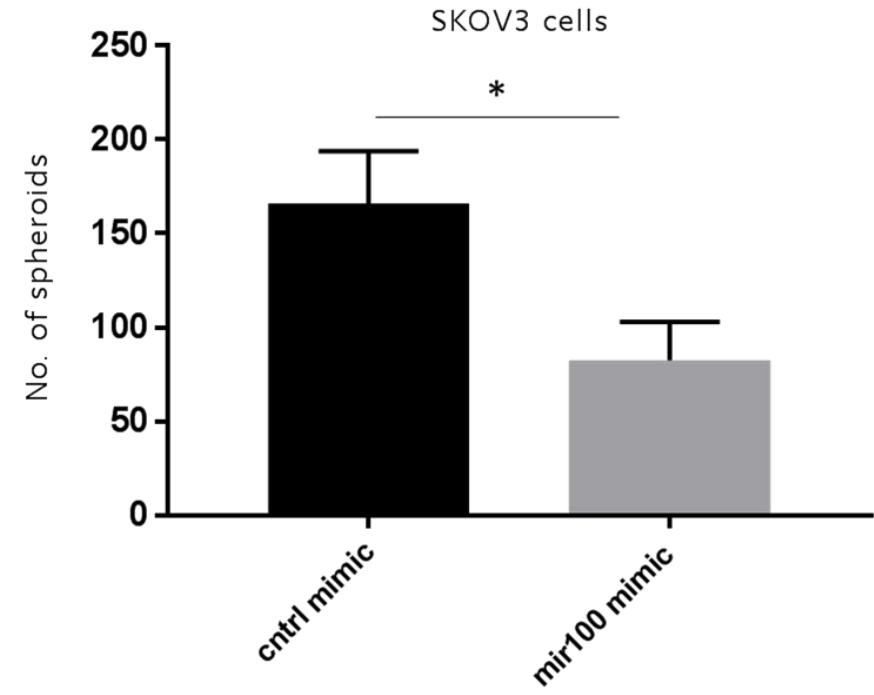

Supplemental V:

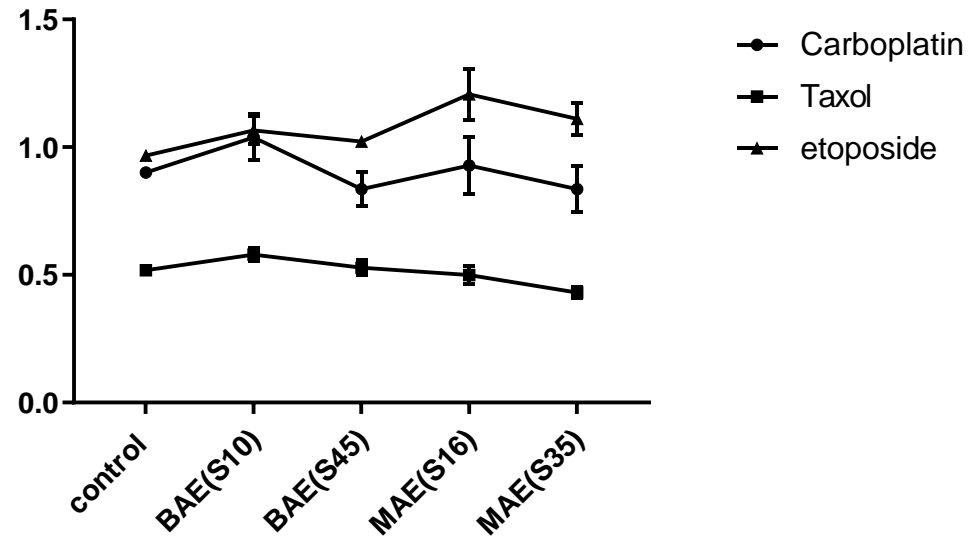

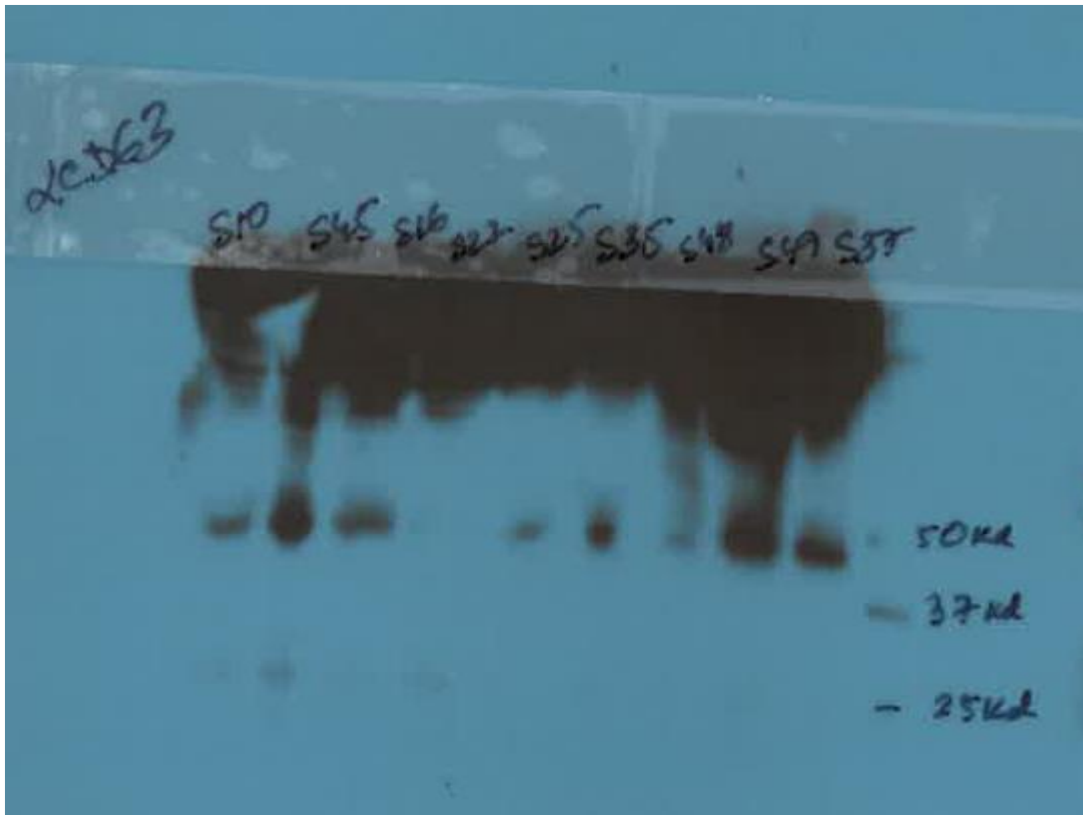

Anti-CD 63, Non reducing

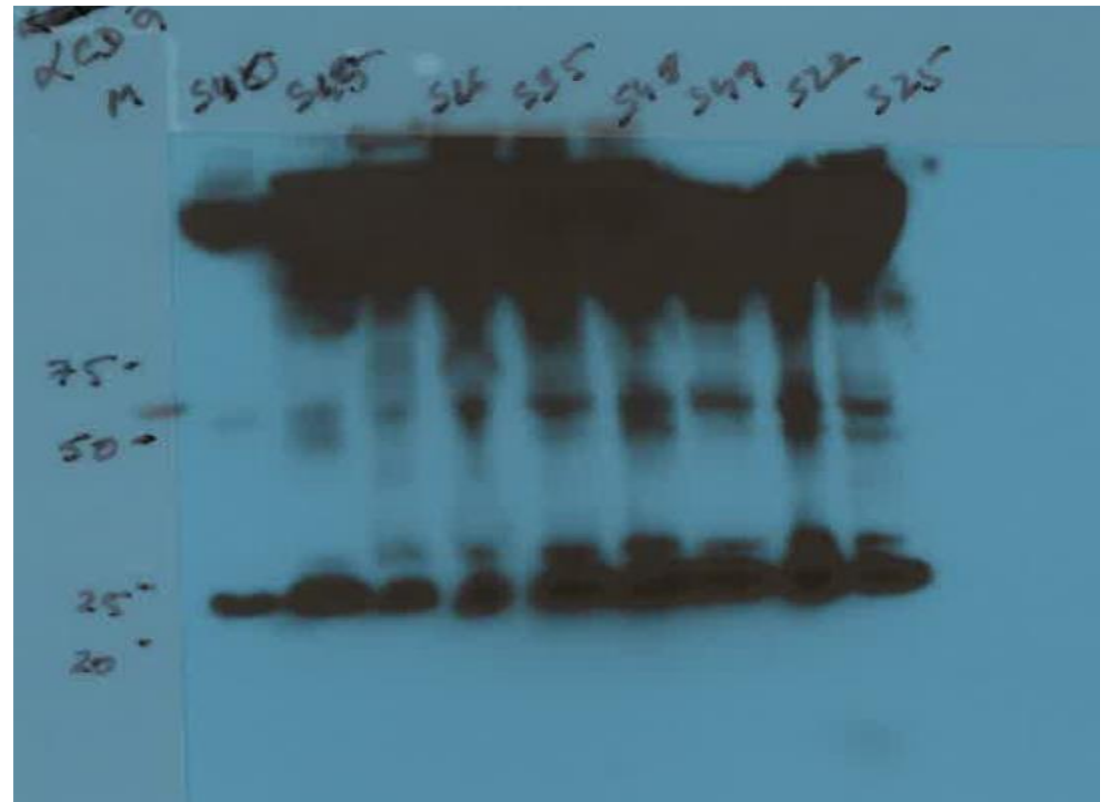

Anti-CD 9, Non reducing

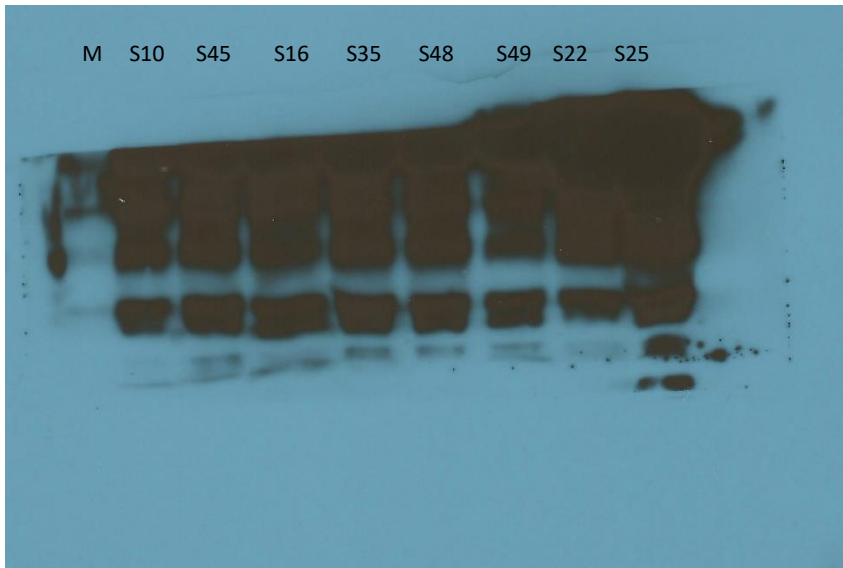

Anti-CD 81, Non reducing

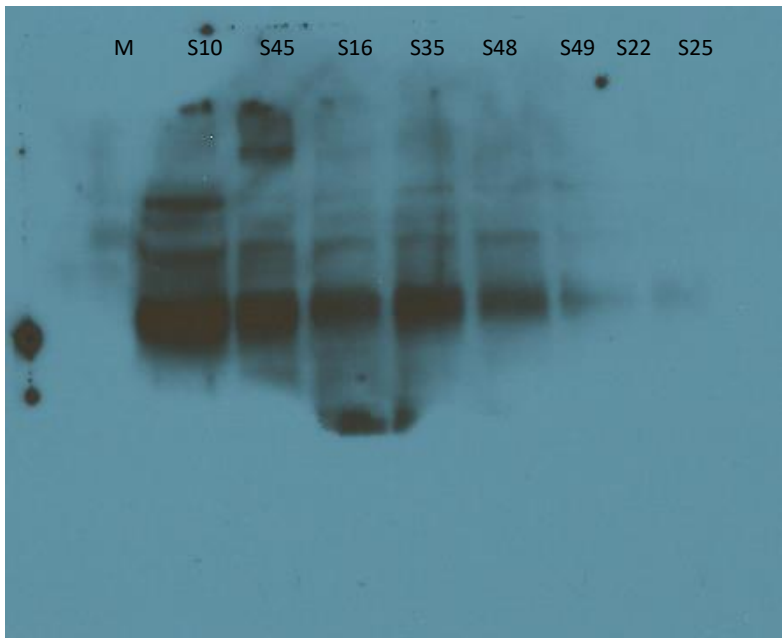

Anti-Alix , high exposure

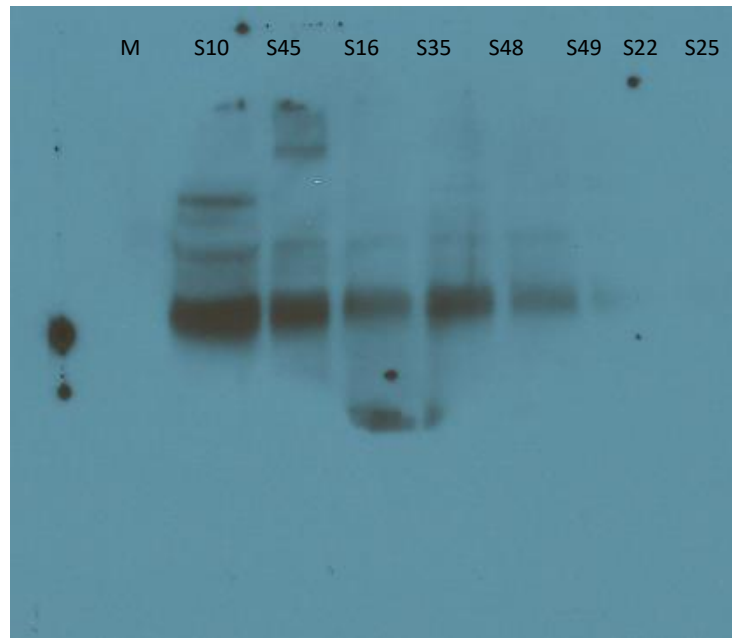

Anti-Alix , low exposure
